# Supplementary material for: In vivo and in silico analysis of PCNA ubiquitylation in the activation of the Post Replication Repair pathway in S. cerevisiae
Source: PubMed Central journal article supplement (PMC3668150; doi:10.1186/1752-0509-7-24), 2013-03-20
Supplement: 1752-0509-7-24-S6.pdf [file 1752-0509-7-24-S6.pdf]

## **ADDITIONAL FILE 6**

### **PDB accession codes for protein complexes analyzed through 3D structural modeling**

PDB accession codes for proteins and protein complexes analyzed through the structural modeling approach (see also Additional Files 7 and 9).

| <b>Protein/complex</b> | <b>PDB accession code</b> |
|------------------------|---------------------------|
| UBA3-Ubc12             | 1Y8X                      |
| Uba1                   | 3CMM                      |
| Rad6                   | 1AYZ                      |
| UbcH7-c-CBL(RING)      | 1FVB                      |
| Ubc13-Mms2             | 2GMI                      |
