# Supplementary material for: In vivo and in silico analysis of PCNA ubiquitylation in the activation of the Post Replication Repair pathway in S. cerevisiae
Source: PubMed Central journal article supplement (PMC3668150; doi:10.1186/1752-0509-7-24), 2013-03-20
Supplement: 1752-0509-7-24-S11.pdf [file 1752-0509-7-24-S11.pdf]

## ADDITIONAL FILE 11

### Early time-course of PCNA ubiquitylation after low acute UV irradiation

The figure shows the time-course measurement of mono-, di- and tri-ubiquitylated PCNA isoforms (top part, denoted by  $\alpha-Ub$ ) and of non modified PCNA (bottom part, denoted by  $\alpha-His$ ), sampled from 0 to 20 min after UV irradiation.

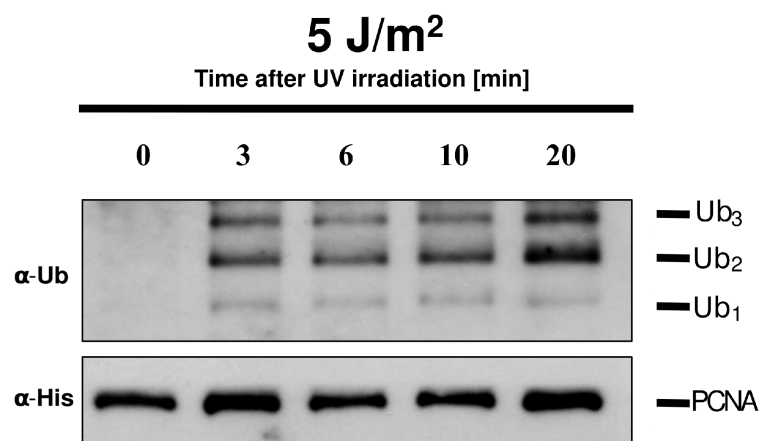

In order to enable the sampling of cells at early time points, we adopted a different protocol of UV irradiation: cells were UV irradiated at 5 J/m<sup>2</sup> and lysed on plate at the indicated time-points without liquid holding (as we instead did for all the experiments of this study). PCNA ubiquitylated isoforms were detected after denaturing pull-down, SDS-urea page and western blotting, as described in Section “Methods”.
