# Supplementary material for: In vivo and in silico analysis of PCNA ubiquitylation in the activation of the Post Replication Repair pathway in S. cerevisiae
Source: PubMed Central journal article supplement (PMC3668150; doi:10.1186/1752-0509-7-24), 2013-03-20
Supplement: 1752-0509-7-24-S17.pdf [file 1752-0509-7-24-S17.pdf]

## ADDITIONAL FILE 17

### Deletion of *UBP10* and *UBP15* do not prevent PCNA deubiquitylation at later time-points after low acute UV irradiation

The figure shows the time-course measurement of mono-, di- and tri-ubiquitylated PCNA isoforms (top part, denoted by  $\alpha$ -Ub) and of non modified PCNA (bottom part, denoted by  $\alpha$ -His), sampled from 0 to 5 h after UV irradiation.

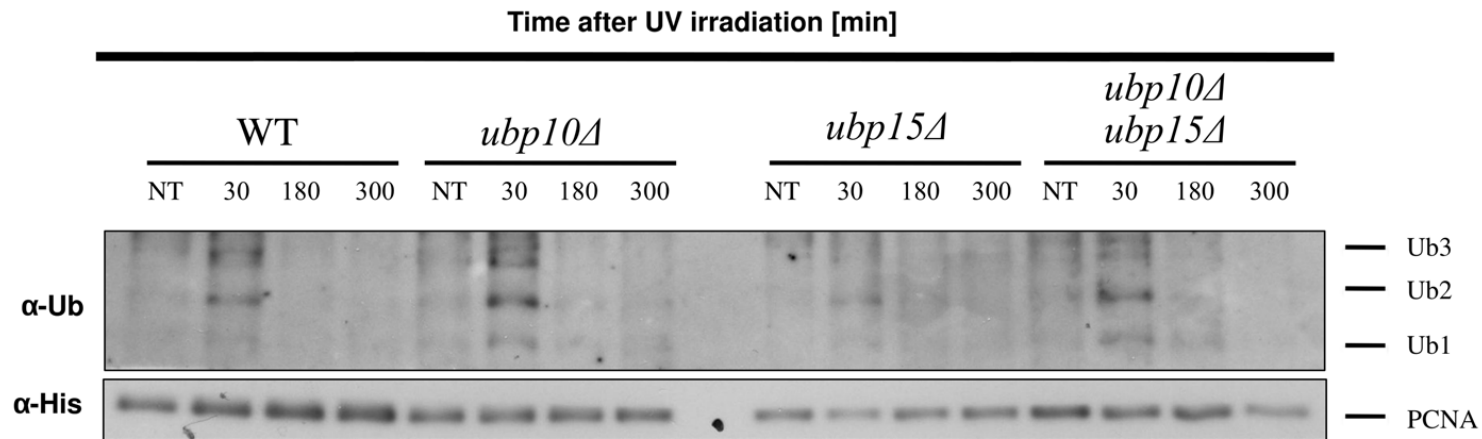

Wild type, single mutant and double mutant yeast cells were UV irradiated at 5 J/m<sup>2</sup>, and collected at the indicated time-points. PCNA ubiquitylated isoforms were detected after denaturing pull-down, SDS-urea page and western blotting, as described in Section “Methods”.
